# Supplementary material for: N-Heterocyclic Carbene-Iridium Complexes as Photosensitizers for In Vitro Photodynamic Therapy to Trigger Non-Apoptotic Cell Death in Cancer Cells
Source: MDPI journal article supplement (doi:10.3390/molecules28020691), 2023-01-10

## Supplementary Materials

# ***N*-Heterocyclic Carbene-Iridium Complexes as Photosensitizers for In Vitro Photodynamic Therapy to Trigger Non-Apoptotic Cell Death in Cancer Cells**

Xing Wang <sup>1,†</sup>, Chen Zhang <sup>1,2,†</sup>, Ryma Madji <sup>1,2,†</sup>, Camille Voros <sup>1</sup>, Serge Mazères <sup>2</sup>, Christian Bijani <sup>1</sup>, Céline Deraeve <sup>1</sup>, Olivier Cuvillier <sup>1,2,\*</sup>, Heinz Gornitzka <sup>1,\*</sup>, Marie-Lise Maddelein <sup>1,2,\*</sup> and Catherine Hemmert <sup>1,\*</sup>

|                                                                                                 |         |
|-------------------------------------------------------------------------------------------------|---------|
| Table S1. Cytotoxic activity of iridium(III) NHC complexes <b>4a–4g</b> .....                   | S1      |
| <sup>1</sup> H and <sup>13</sup> C NMR spectra of proligands <b>3a–3f</b> .....                 | S2–S8   |
| <sup>1</sup> H and <sup>13</sup> C NMR spectra of iridium(III) NHC complexes <b>4a–4g</b> ..... | S9–S15  |
| 2D NMR spectra of iridium(III) NHC complex <b>4a</b> .....                                      | S16–S17 |

**Table S1.** Cytotoxic activity of iridium(III) NHC complexes **4a–4g** expressed as GI<sub>50</sub> (μM) values towards selected cancer and normal cell lines as determined by MTT assay (48 h).<sup>a</sup>

| Complex                                | PC-3 | T24  | NIH3T3 | SI (PC-3) | SI (T24) |
|----------------------------------------|------|------|--------|-----------|----------|
| <b>4a</b>                              | 0.48 | 0.31 | 3.3    | 6.9       | 10.6     |
| <b>4b</b>                              | 0.51 | 0.38 | 3.5    | 6.9       | 9.2      |
| <b>4c</b>                              | 0.41 | 0.43 | 7.1    | 17.3      | 16.5     |
| <b>4d</b>                              | 0.71 | 0.95 | 8.5    | 12.0      | 8.9      |
| <b>4e</b>                              | 0.25 | 0.29 | 2.5    | 10.0      | 8.6      |
| <b>4f</b>                              | 0.91 | 0.91 | 4.1    | 4.5       | 4.5      |
| <b>4g</b>                              | 0.27 | 0.25 | 2.7    | 10.0      | 10.8     |
| [IrCl(ppy) <sub>2</sub> ] <sub>2</sub> | >20  | 14.8 | >20    | >1        | >1.4     |

<sup>a</sup> GI<sub>50</sub> values correspond to the concentration of complexes causing 50 % inhibition of cell growth.

Data were obtained from three independent experiments.

The cytotoxic effects of the NHC precursors, the imidazolium salts, which represents the potential hydrolysis and/or degradation products of the complexes, have been published before [SI-1, SI-2].

SI-1 Hemmert, C.; Fabié, A.; Fabre, A.; Benoit-Vical, F.; Gornitzka, H. Synthesis, structures, and antimalarial activities of some silver(I), gold(I) and gold(III) complexes involving N-heterocyclic carbene ligands. *Eur. J. Med. Chem.* **2013**, *60*, 64–75. <https://doi.org/10.1016/j.ejmech.2012.11.038>.

SI-2 Hemmert, C.; Ramadani, A.P.; Boselli, L.; Álvarez, Á.F.; Paloque, L.; Augereau, J.-M.; Gornitzka, H.; Benoit-Vical, F. An-tiplasmodial activities of gold(I) complexes involving functionalized N-heterocyclic carbenes. *Bioorg. Med. Chem.* **2016**, *24*, 3075–3082. <https://doi.org/10.1016/j.bmc.2016.05.023>.



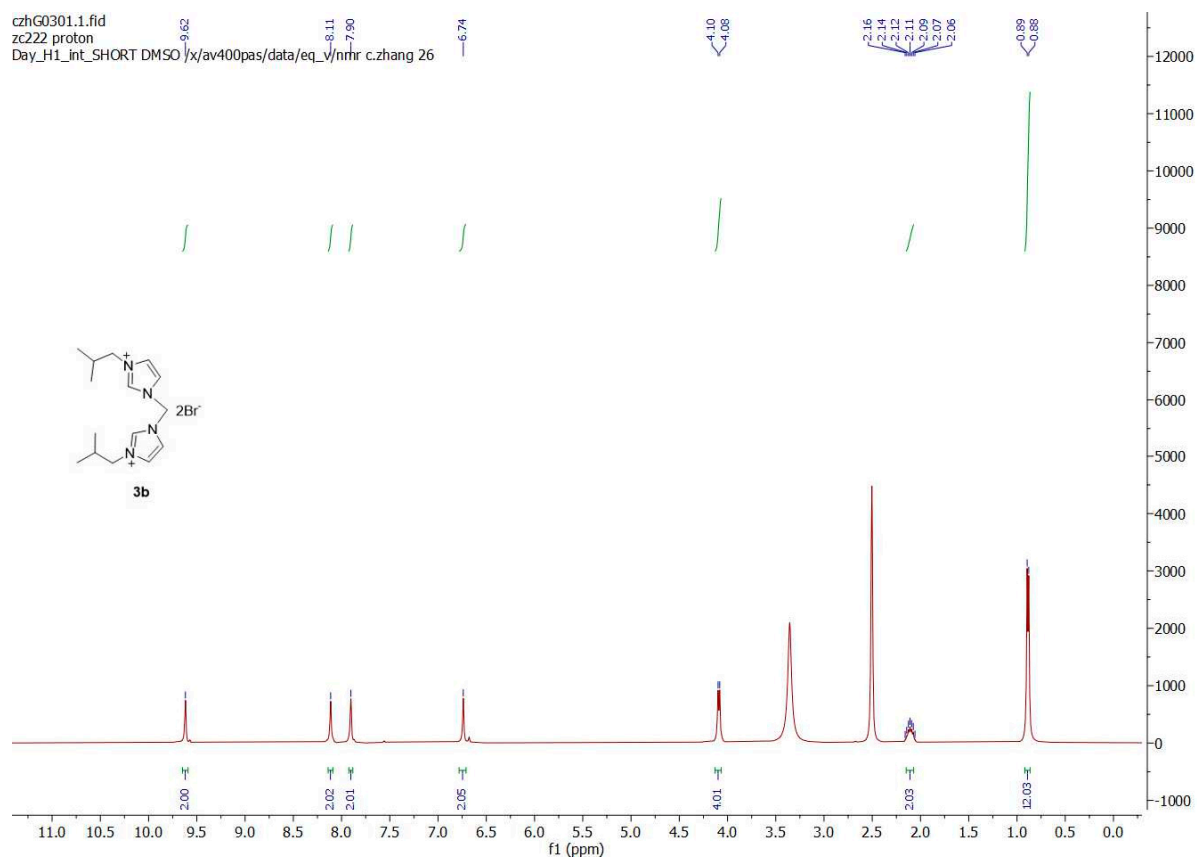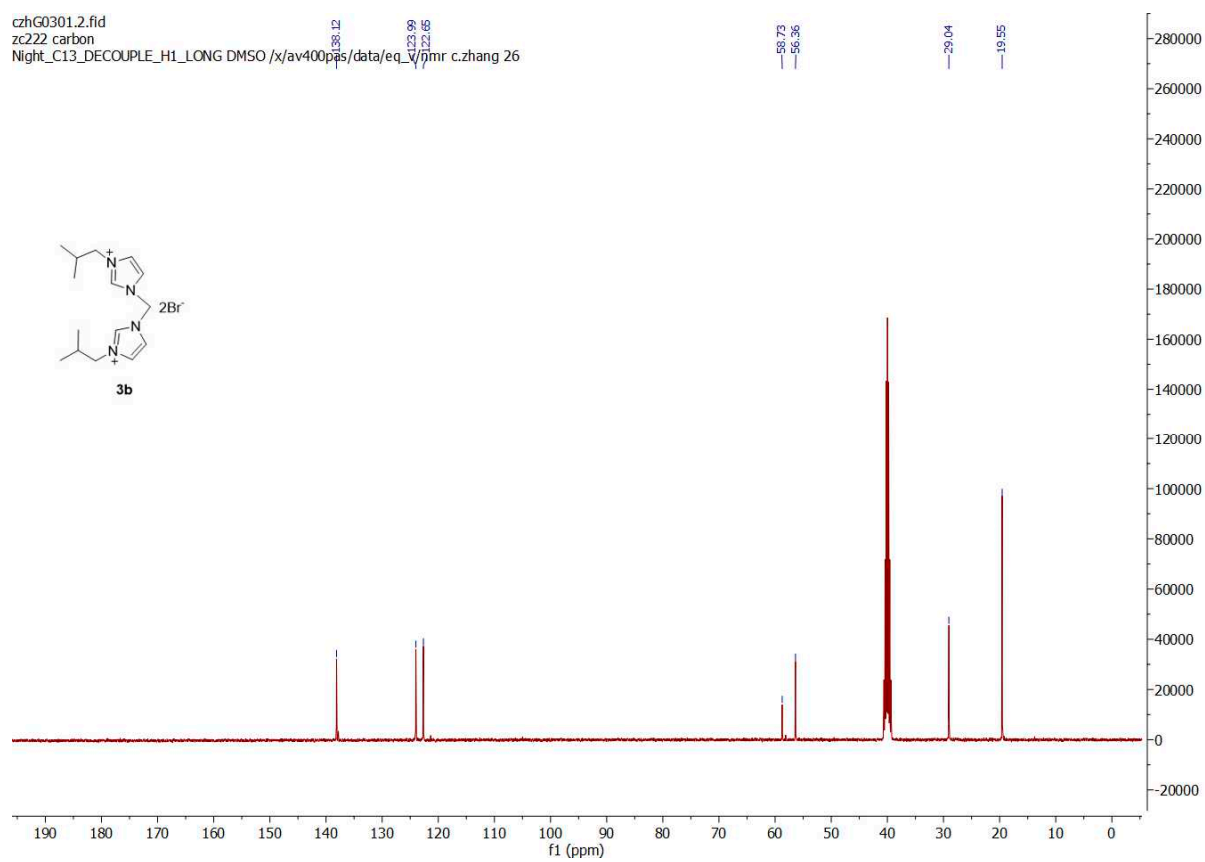

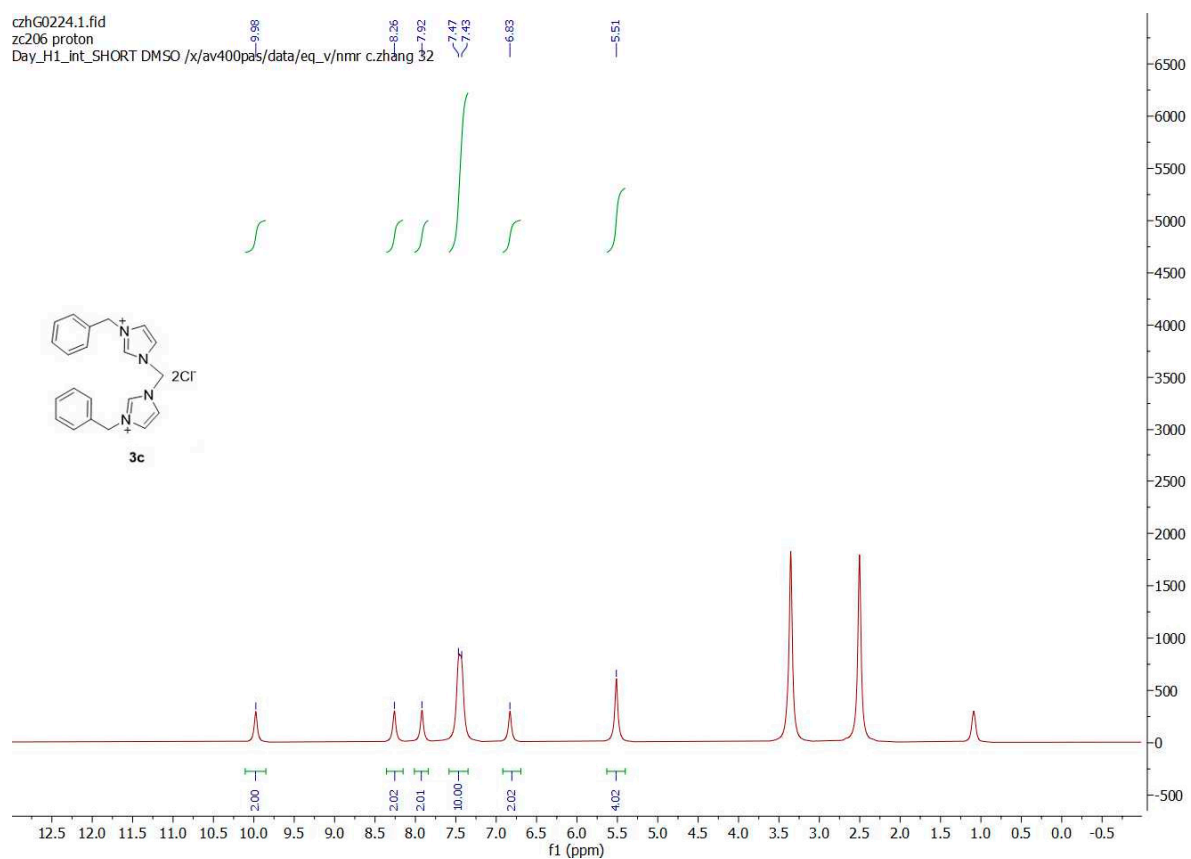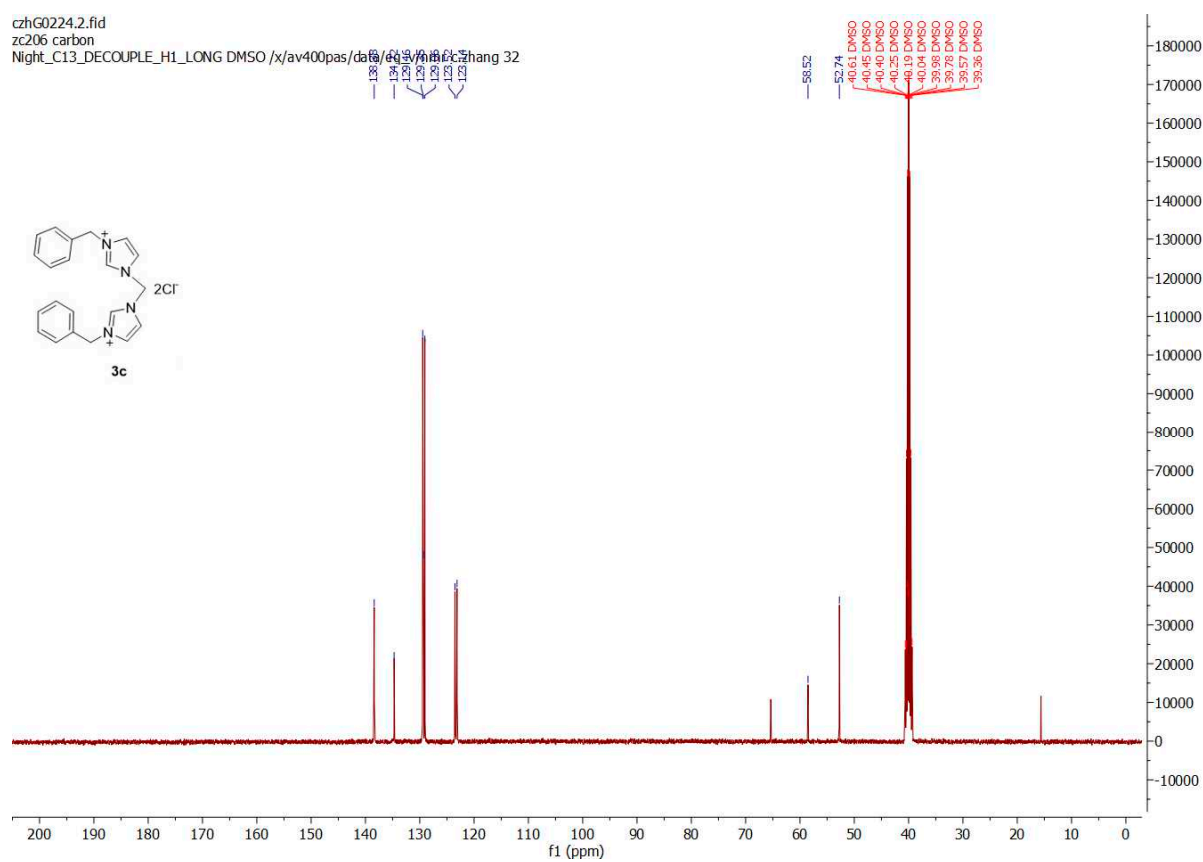

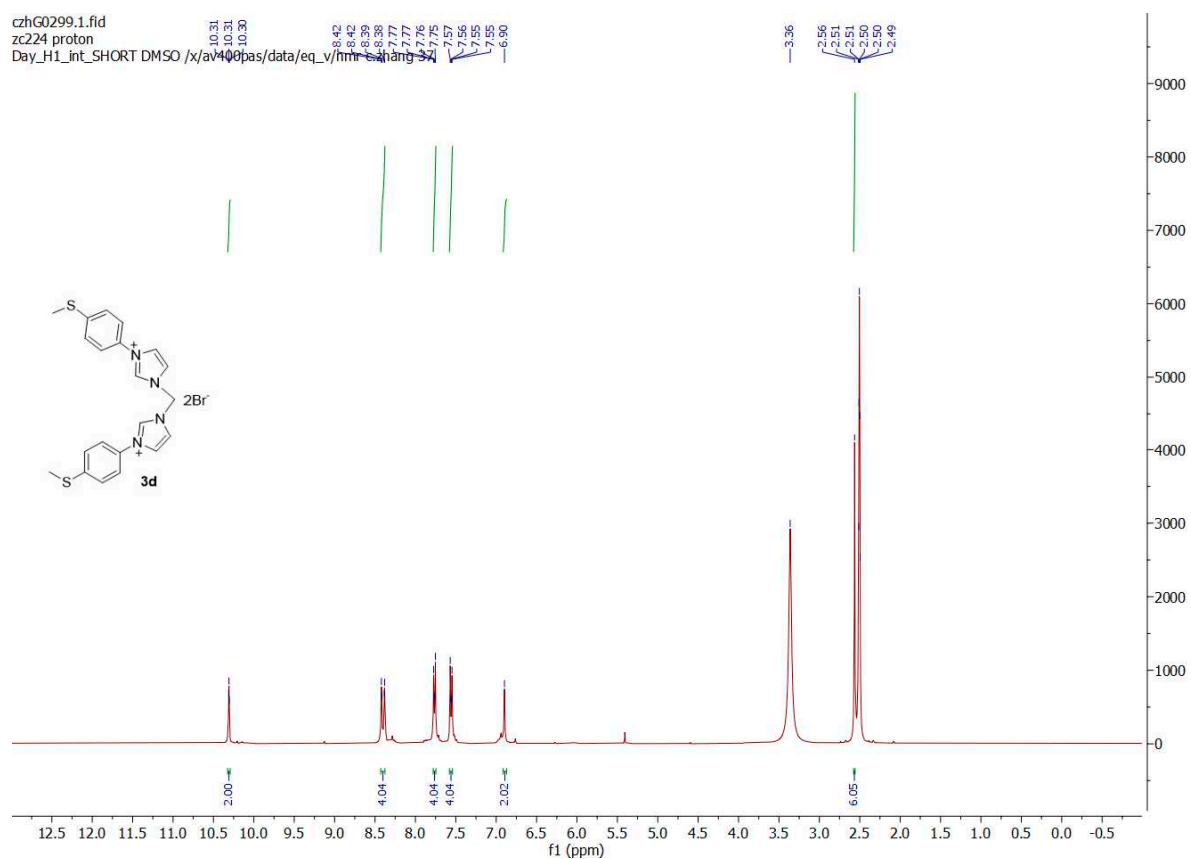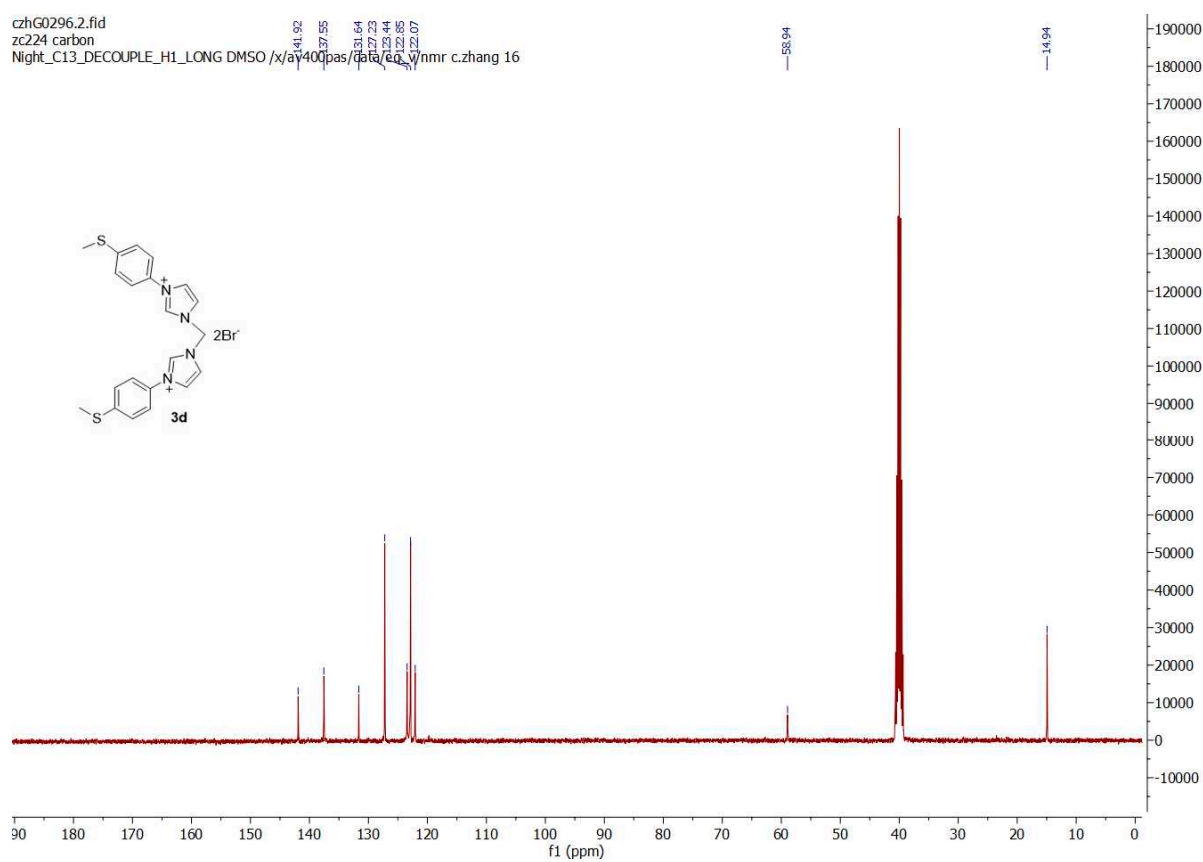

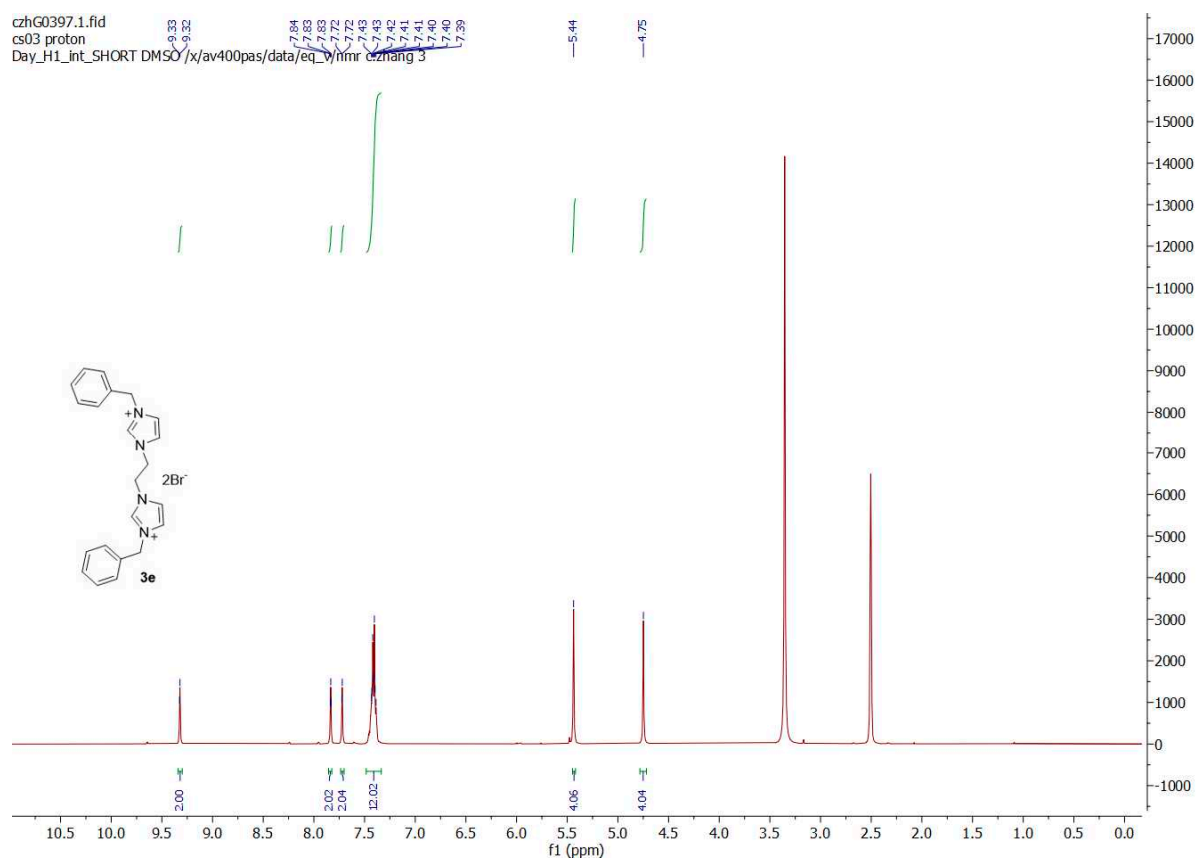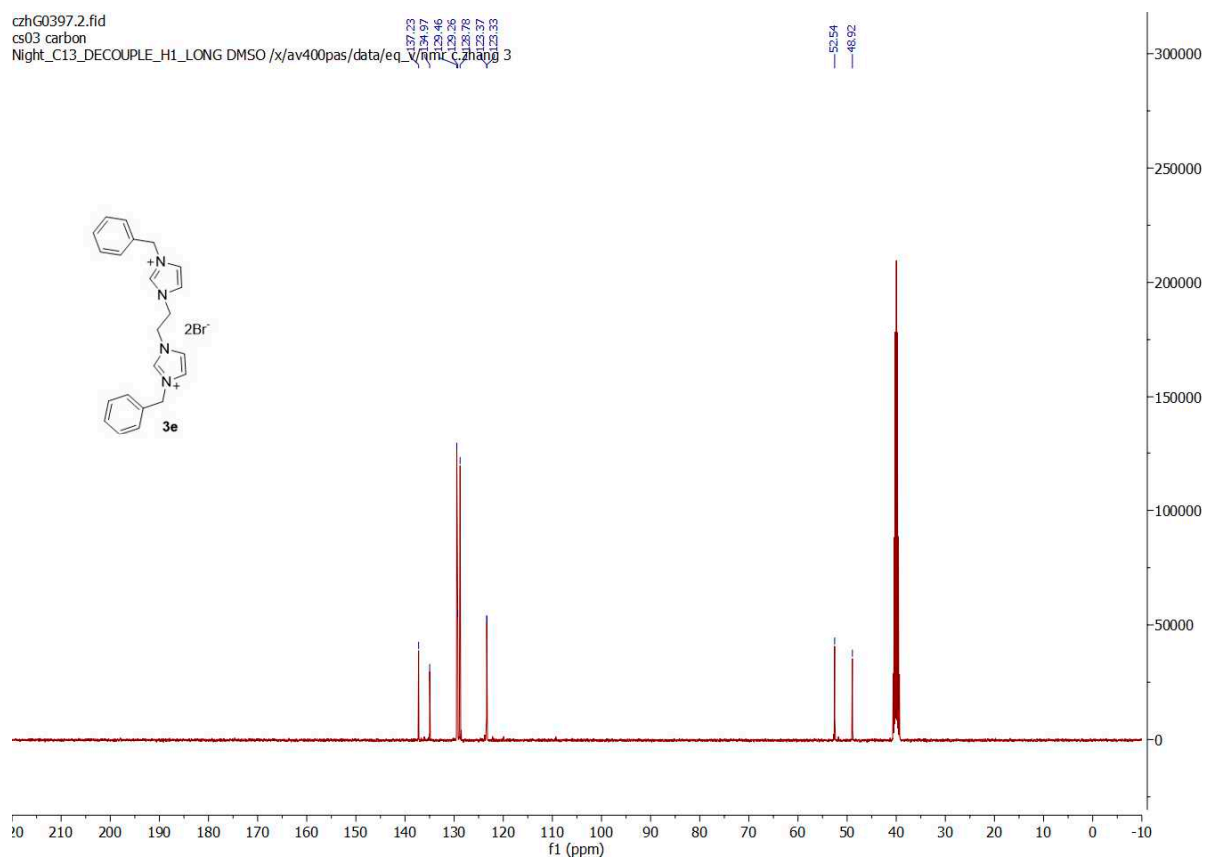

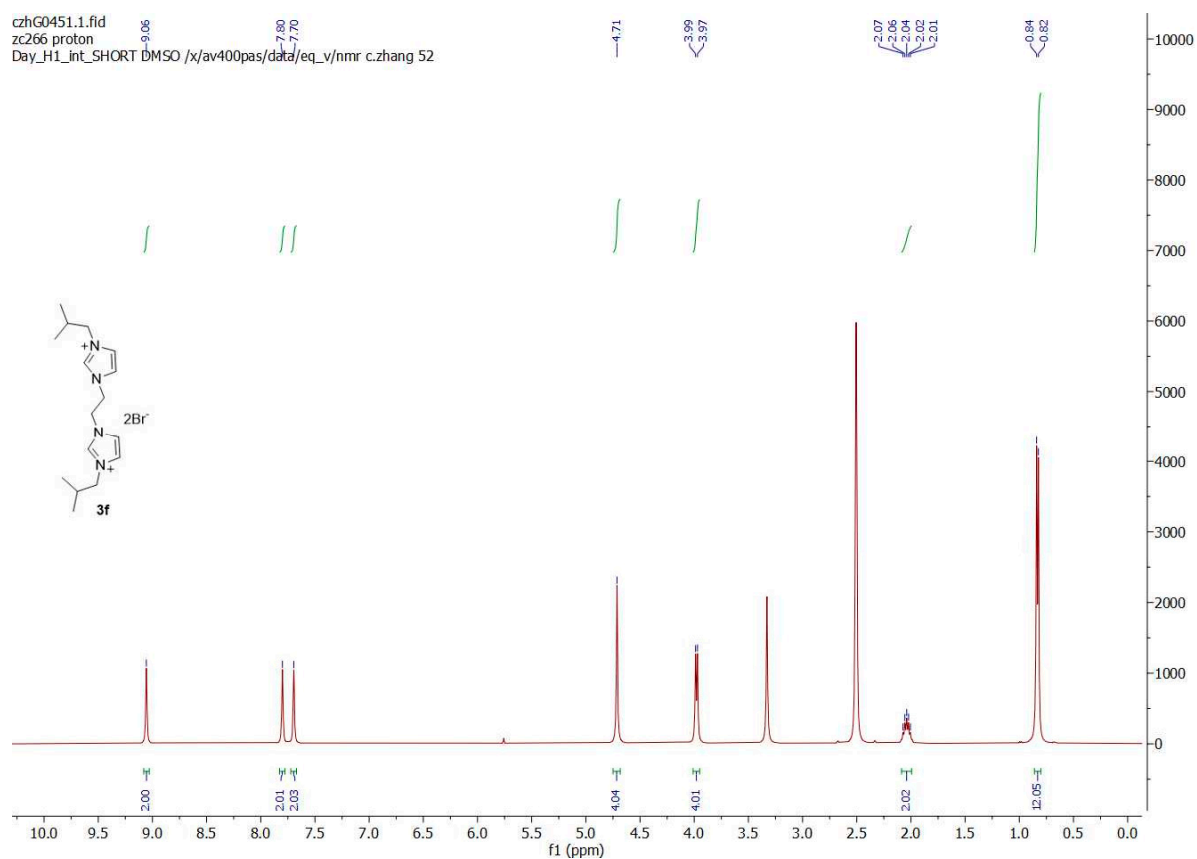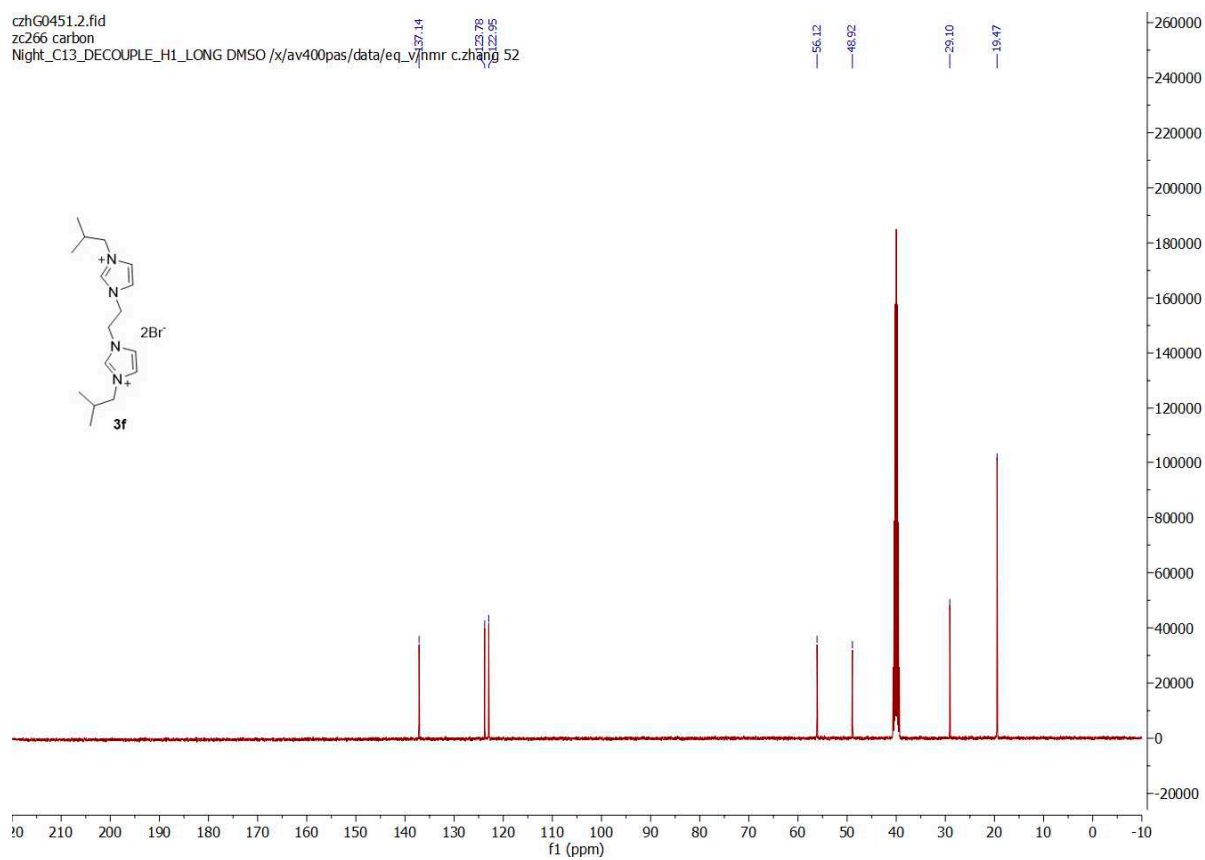



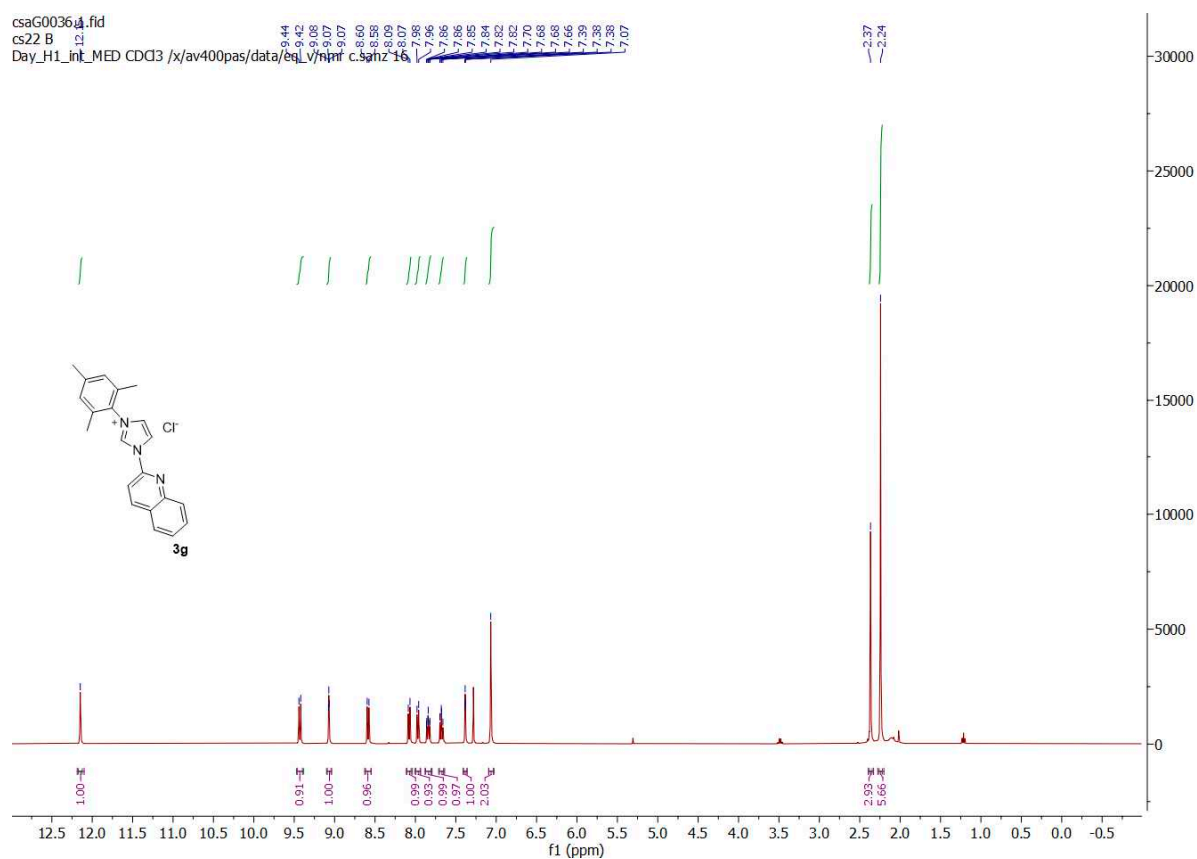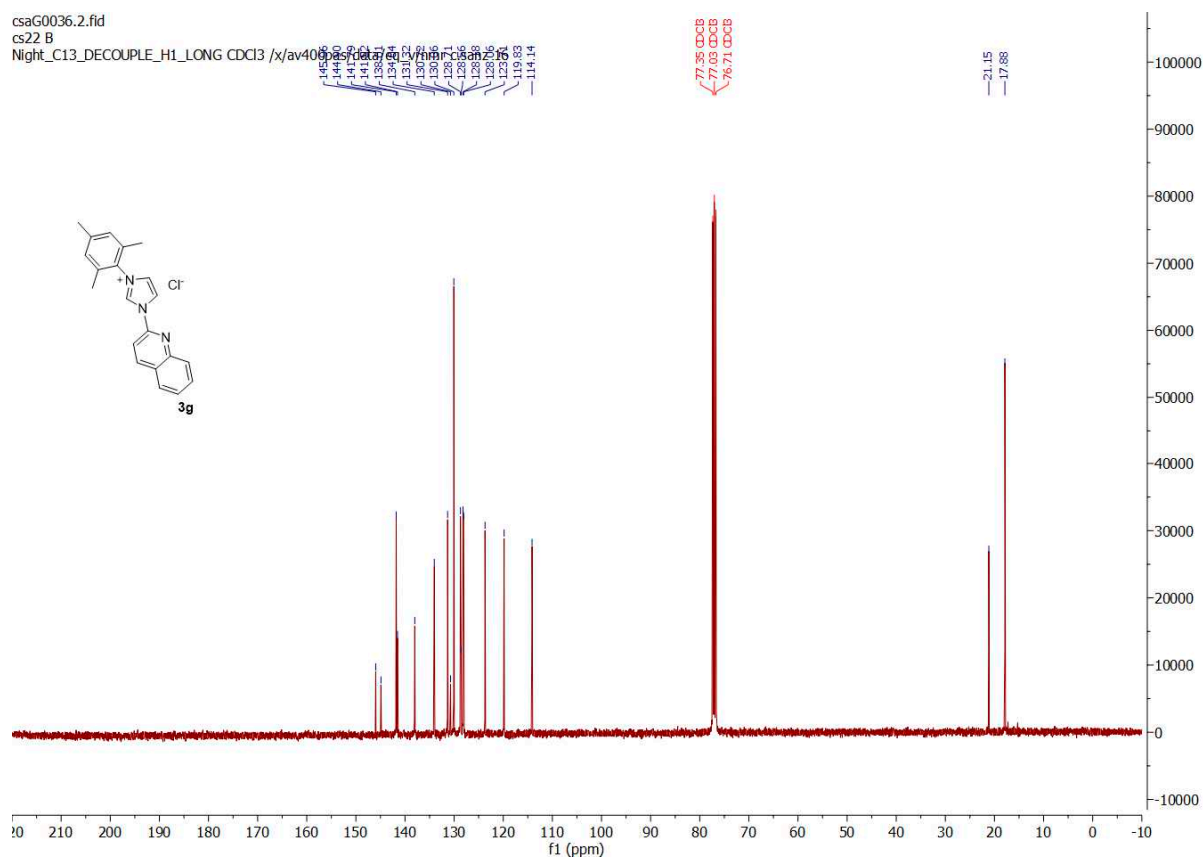



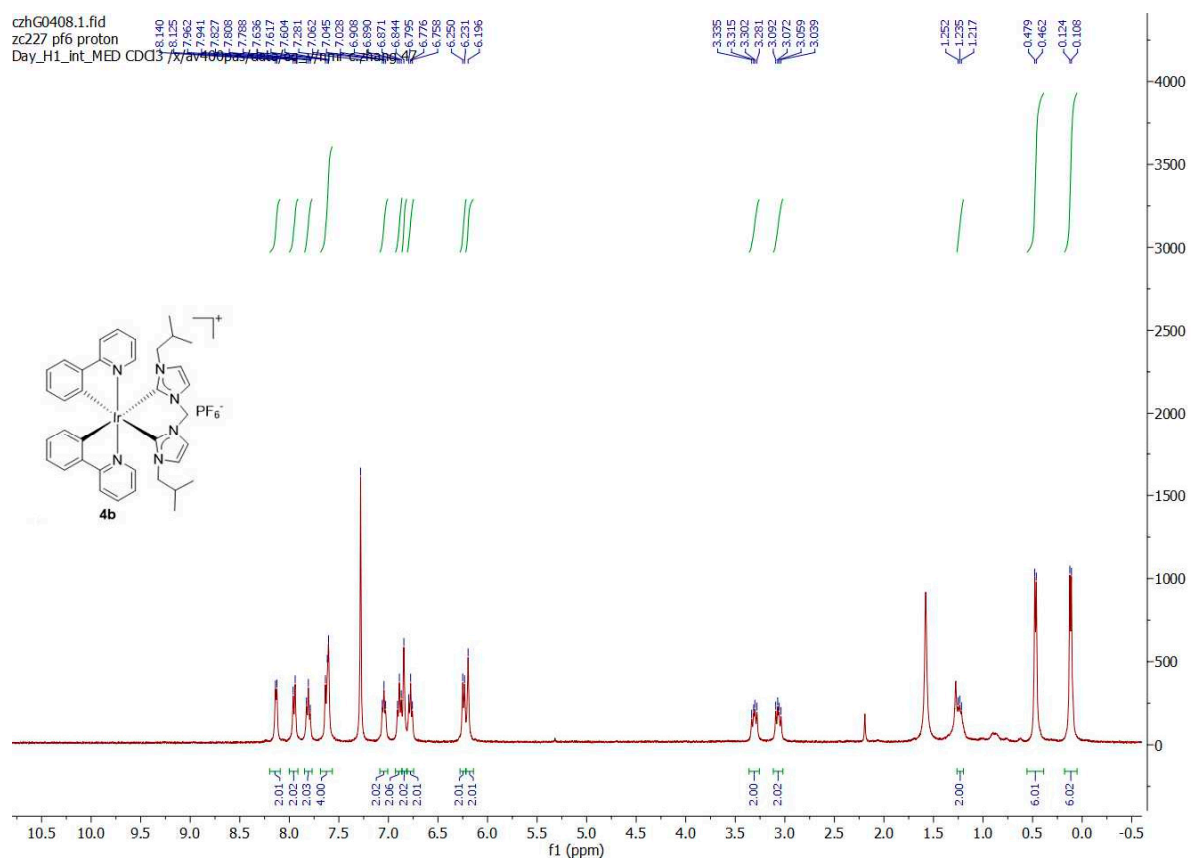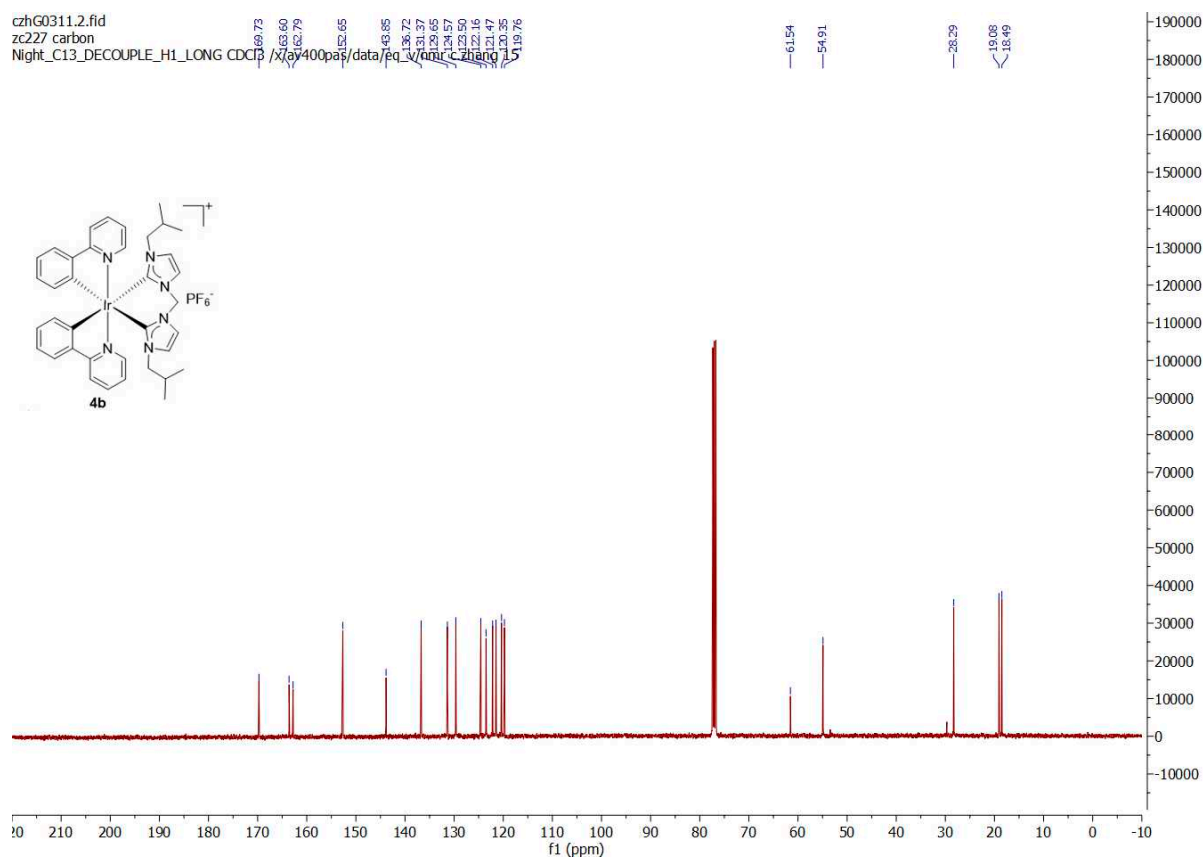

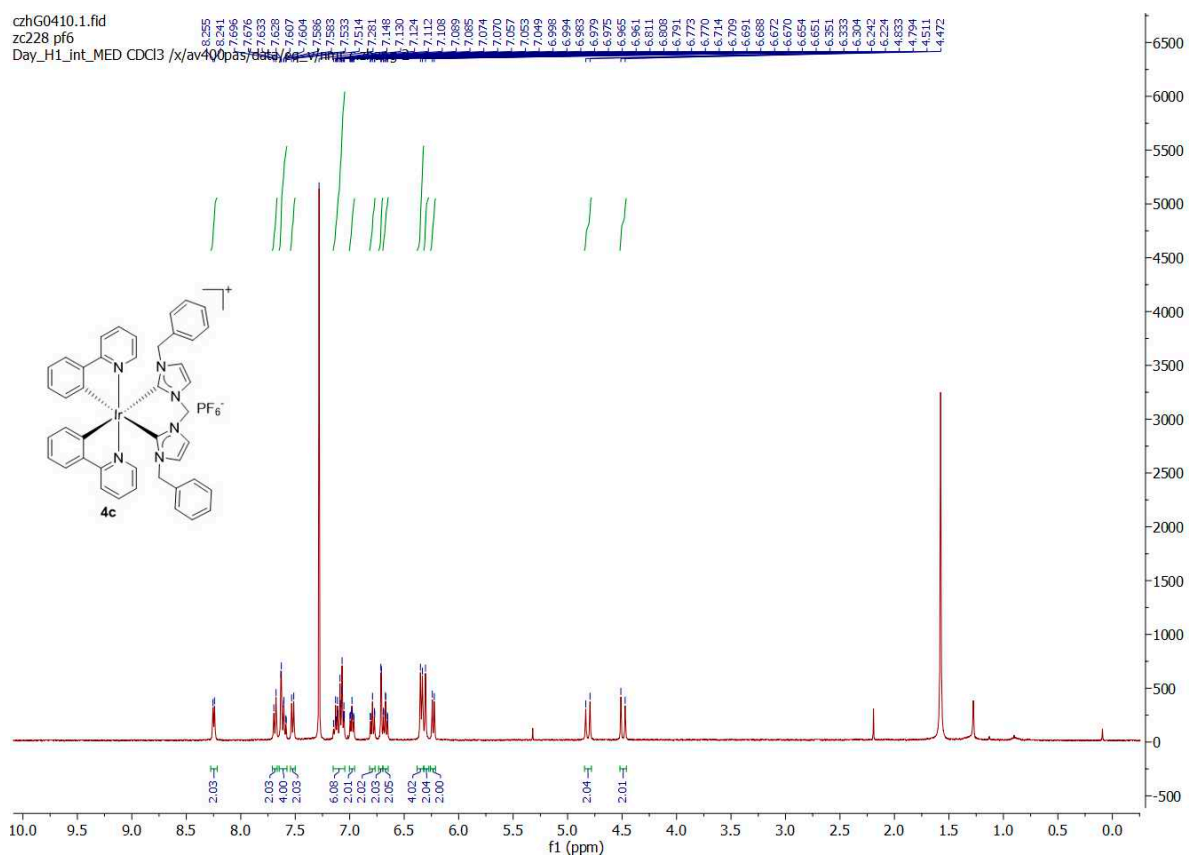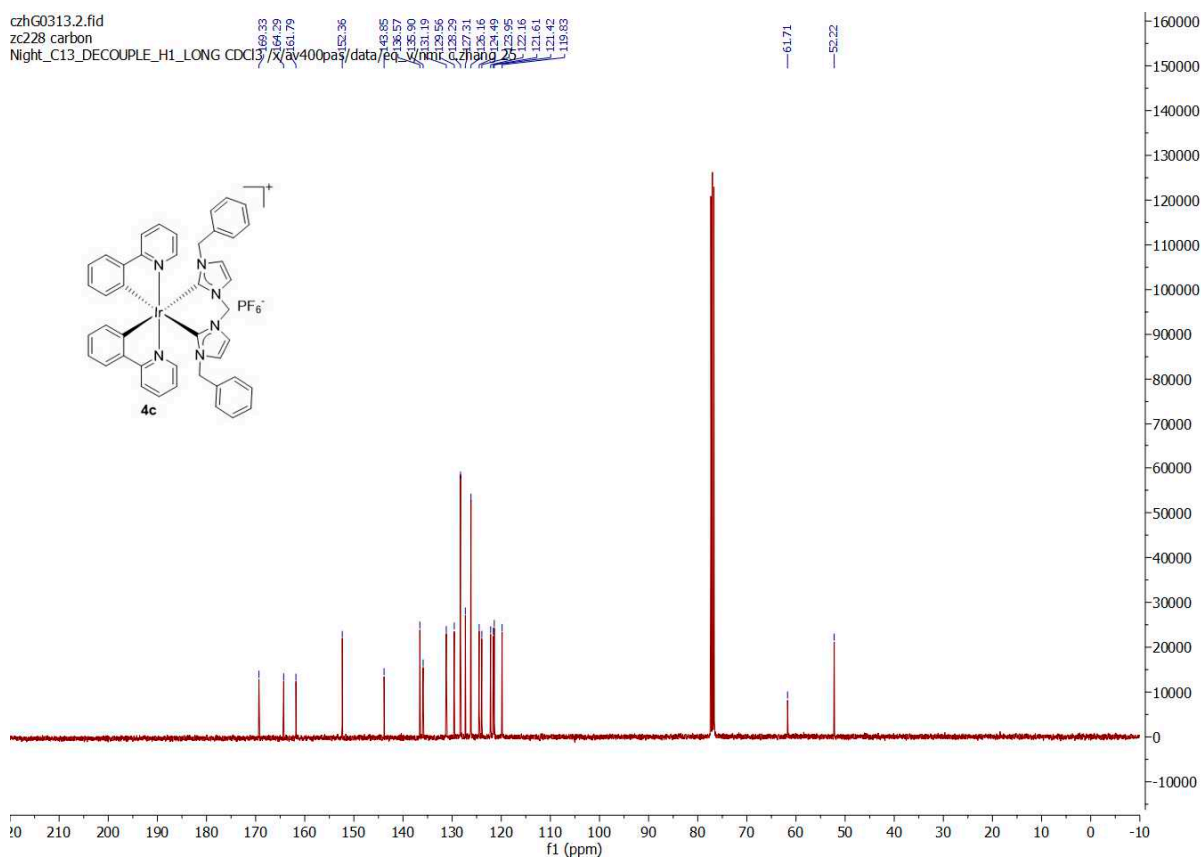

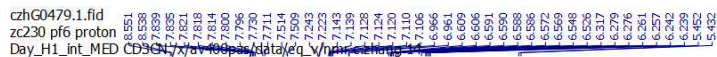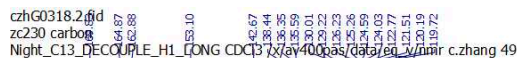

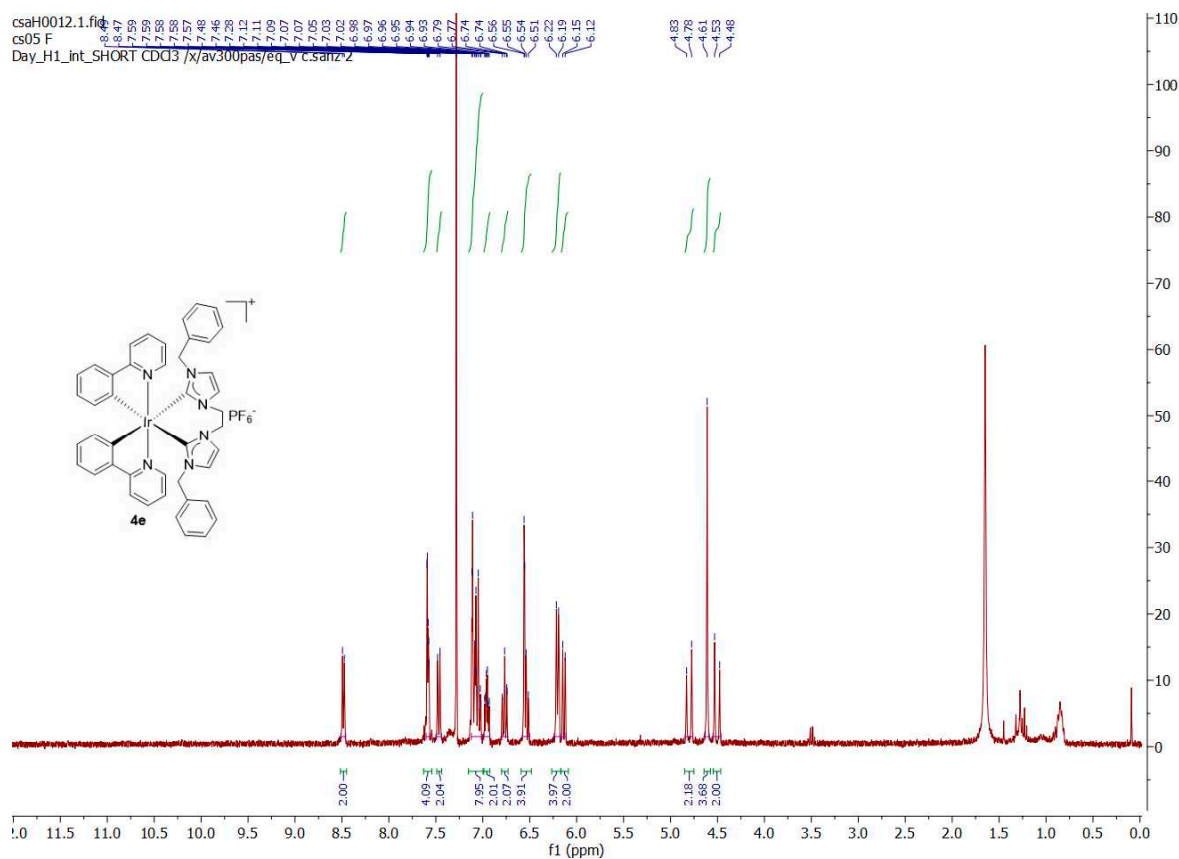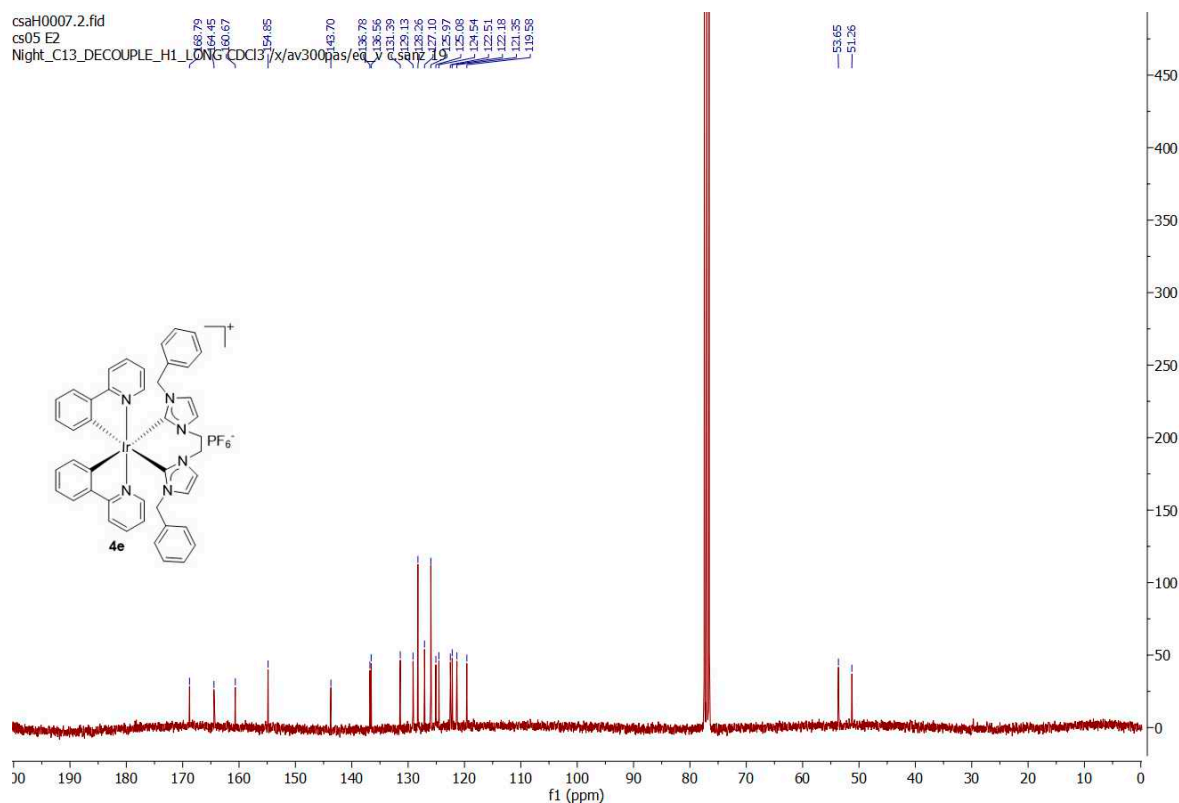

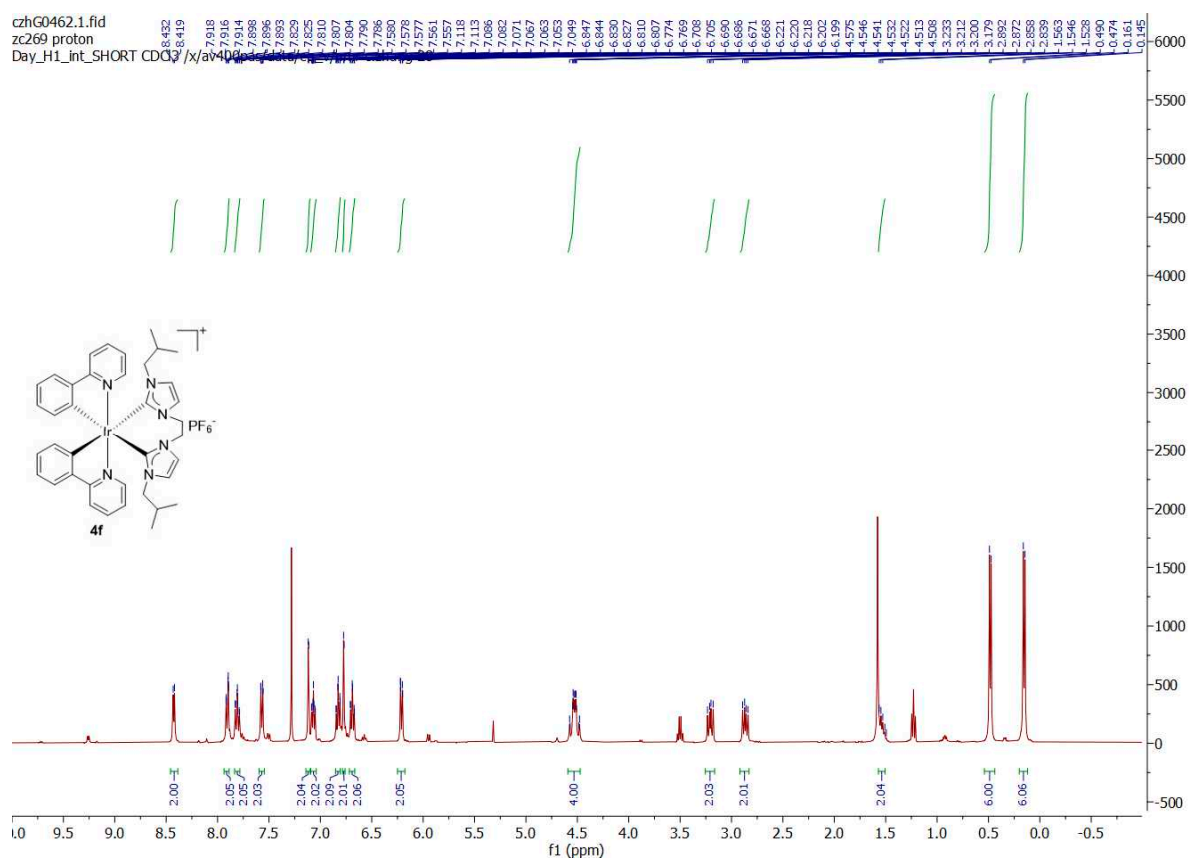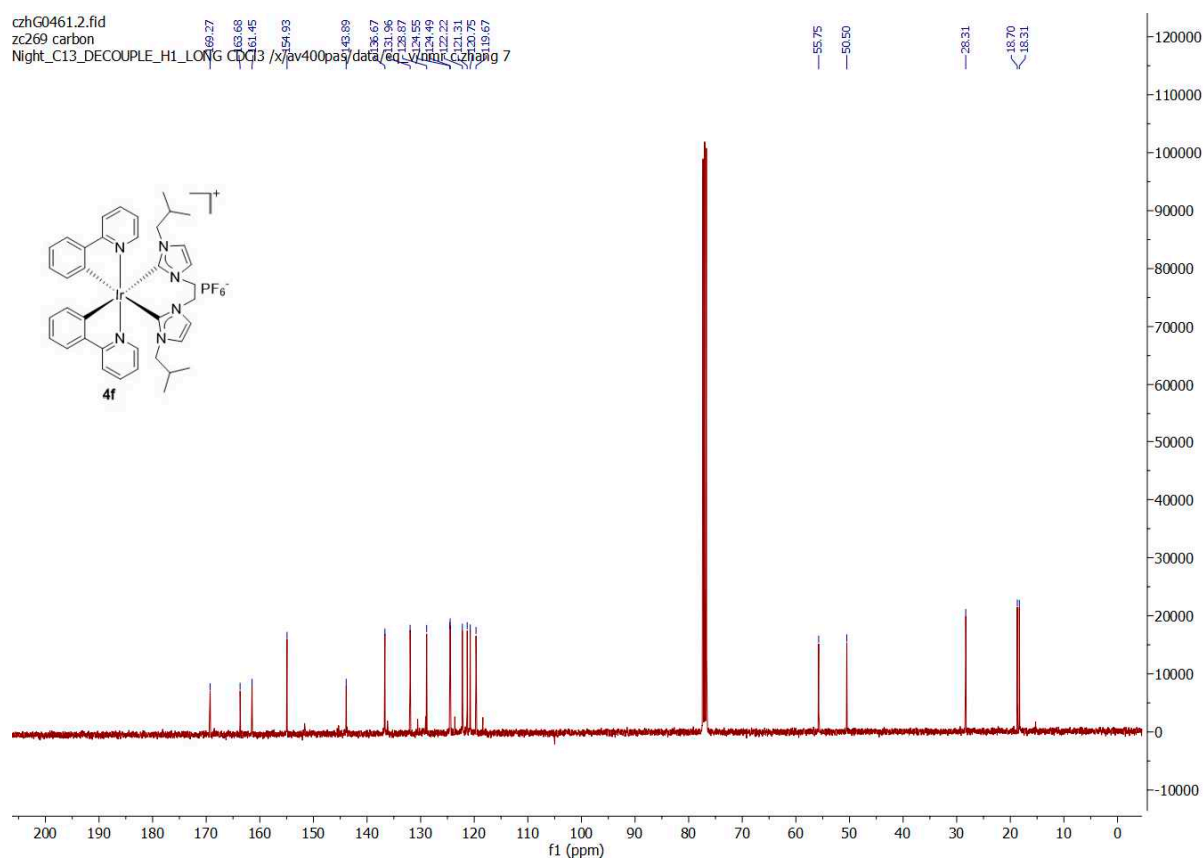



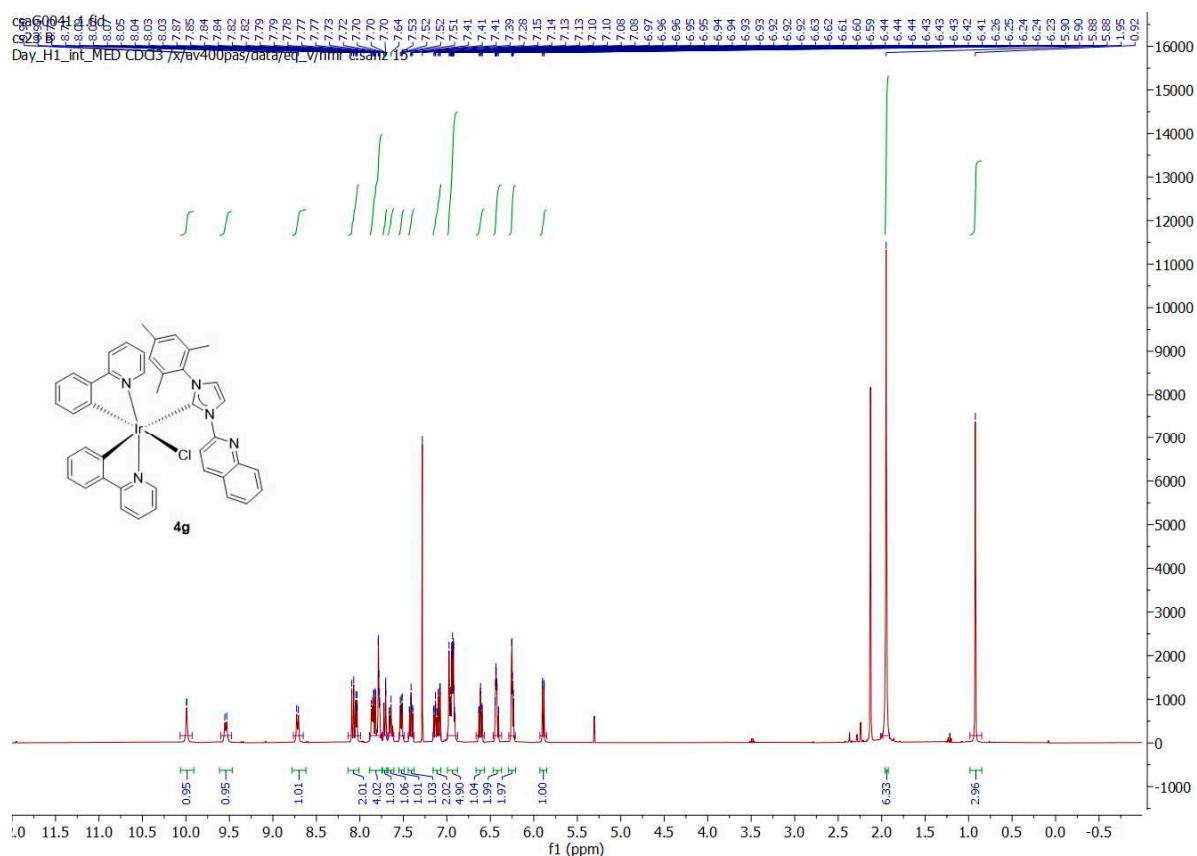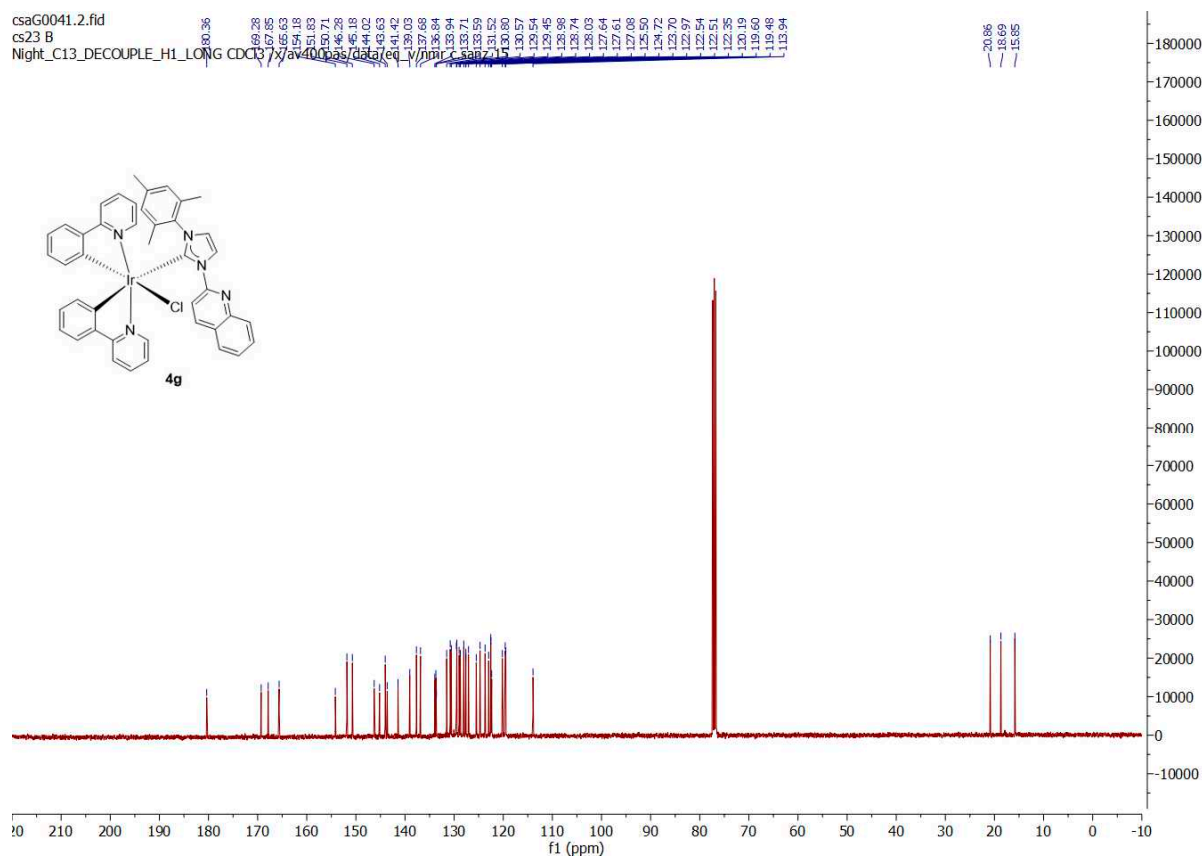



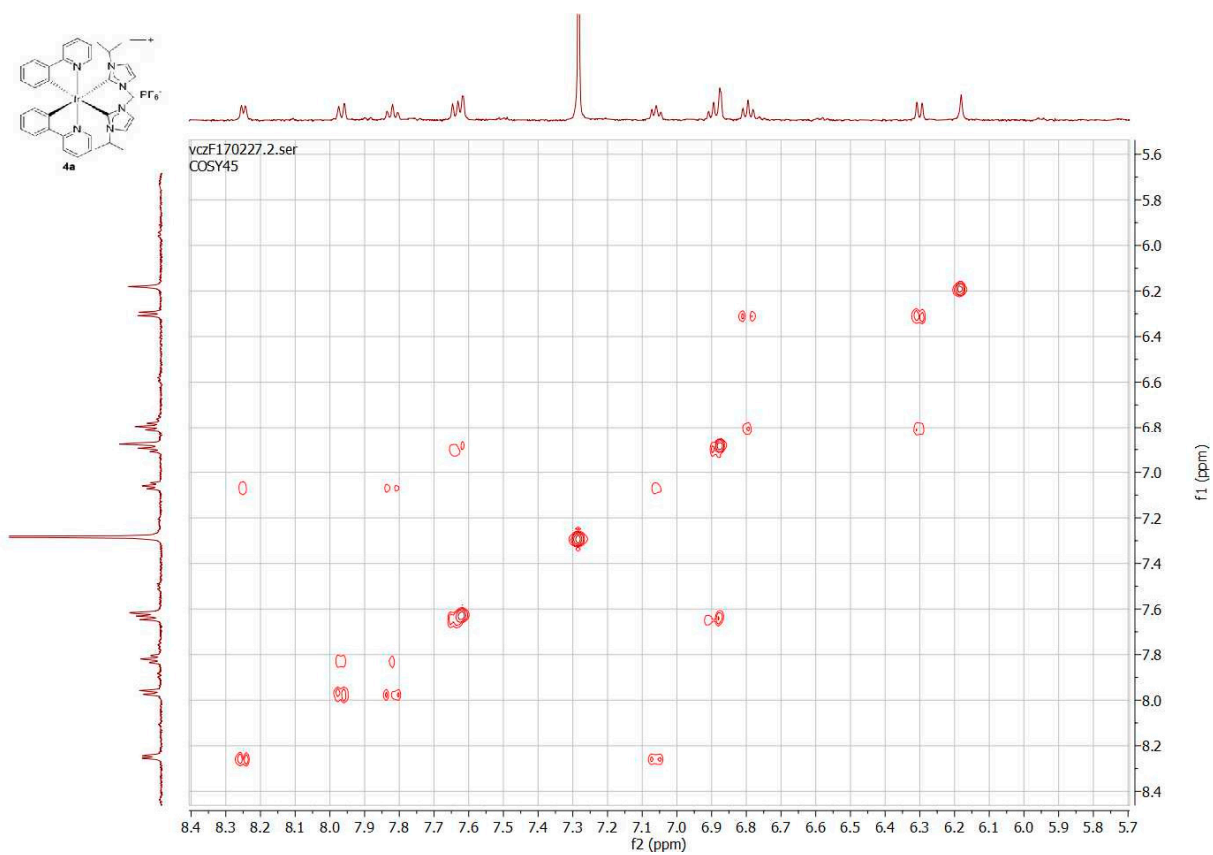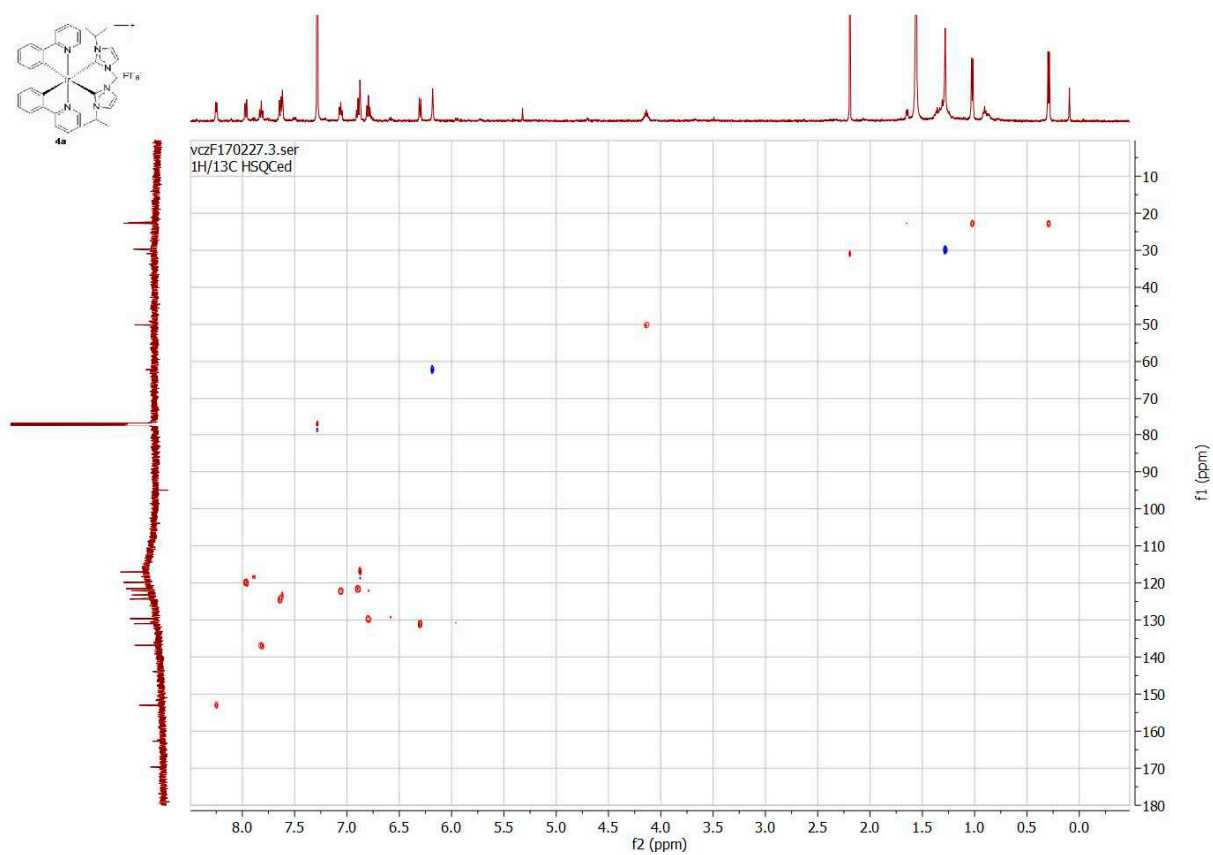

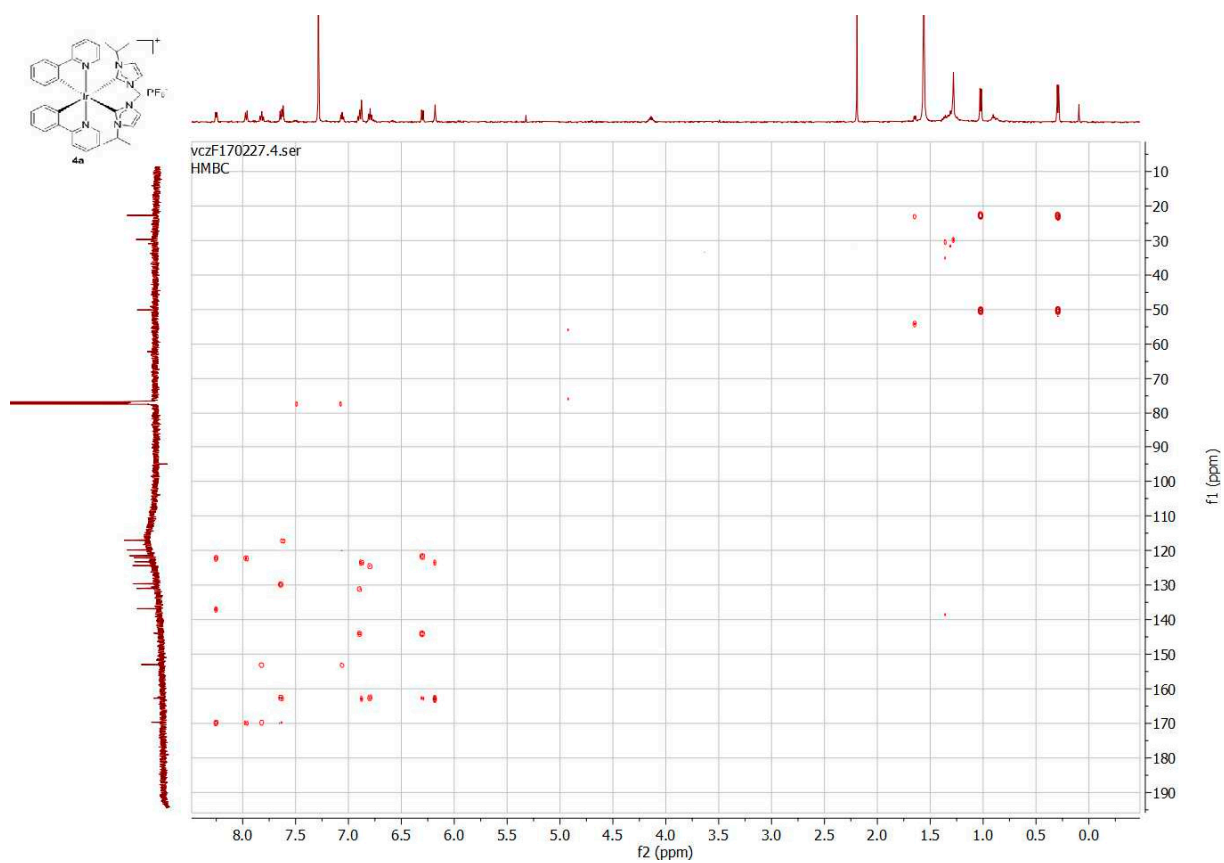

Supplement: s1 [file s1]
